## 17 **Abstract**

18 The metabolic symbiosis with photosynthetic algae of the genus *Symbiodinium* allows corals to  
19 thrive in the oligotrophic environments of tropical seas. Many aspects of this relationship have  
20 been investigated using transcriptomic analyses in the emerging model organism *Aiptasia*.  
21 However, previous studies identified thousands of putatively symbiosis-related genes, making it  
22 difficult to disentangle symbiosis-induced responses from undesired experimental parameters.  
23 Using a meta-analysis approach, we identified a core set of 731 high-confidence symbiosis-  
24 associated genes that reveal host-dependent recycling of waste ammonium and amino acid  
25 synthesis as central processes in this relationship. Combining transcriptomic and metabolomic  
26 analyses, we show that symbiont-derived carbon enables host recycling of ammonium into  
27 nonessential amino acids. We propose that this provides a regulatory mechanism to control  
28 symbiont growth through a carbon-dependent negative feedback of nitrogen availability to the  
29 symbiont. The dependence of this mechanism on symbiont-derived carbon highlights the  
30 susceptibility of this symbiosis to changes in carbon translocation, as imposed by environmental  
31 stress.

## 32 33 **Introduction**

34 The symbiotic relationship between photosynthetic dinoflagellates of the genus *Symbiodinium*  
35 and corals is the foundation of the coral reef ecosystem. This metabolic symbiosis is thought to  
36 enable corals to thrive in the oligotrophic environment of tropical oceans by allowing efficient  
37 recycling of nitrogenous waste products in return for photosynthates from the symbionts<sup>1</sup>.  
38 Despite the importance of this symbiotic relationship, research has been hampered by the general

39 difficulties associated with the maintenance of corals, their slow growth rates, and the  
40 infeasibility of maintaining them in an aposymbiotic state<sup>2</sup>.

41 To overcome these disadvantages, the sea anemone *Aiptasia* (sensu *Exaiptasia pallida*<sup>3</sup>) has  
42 emerged as a powerful model system in the study of cnidarian-*Symbiodinium* symbiosis. *Aiptasia*  
43 belongs to the same class (Anthozoa) as corals, and similarly establishes a symbiotic relationship  
44 with *Symbiodinium*<sup>4</sup>. In contrast to corals, it can be easily maintained and effectively  
45 manipulated under common laboratory conditions. Its rapid asexual reproduction provides  
46 relatively large amounts of experimental material for high-throughput studies<sup>5</sup>, while sexual  
47 reproduction can be induced efficiently under well-designed conditions<sup>6</sup>. More importantly for  
48 symbiosis-related studies, *Aiptasia* can be maintained in an unstressed, aposymbiotic state as  
49 long as it is fed regularly<sup>7, 8</sup>. It can also be re-infected with a variety of *Symbiodinium* strains<sup>9</sup>,  
50 which allows for comparative studies analyzing the effects of different symbionts on the host.

51 The use of *Aiptasia* as a model organism has advanced our understanding of the metabolic  
52 aspects of symbiosis, in particular the identification of glucose as the main metabolite transferred  
53 from symbiont to host<sup>10</sup>. However, the molecular mechanisms underlying host-symbiont  
54 metabolic interactions are still largely unknown. Particularly the role of nitrogen recycling from  
55 waste ammonium is still debated. While it is generally assumed that ammonium assimilation is  
56 predominantly performed by the symbiont, some studies show that symbiont-growth is nitrogen  
57 limited *in hospite*<sup>11, 12, 13, 14</sup>, suggesting that the host might be able to control nitrogen availability.

58 Consequently, it has been proposed that recycling of ammonium waste by the host might serve as  
59 a mechanism to control symbiont densities<sup>15, 16</sup>.

60 Many genomic, transcriptomic, and proteomic studies have been conducted on the topic of  
61 cnidarian-*Symbiodinium* symbiosis in the last two decades to unravel the molecular

62 underpinnings of this relationship<sup>17, 18, 19, 20, 21, 22, 23</sup>. Due to technical limitations, most of these  
63 studies did not have the sensitivity required to detect extensive changes of symbiosis-associated  
64 genes. However, these limitations are gradually being overcome by next-generation sequencing  
65 techniques. The first *Aiptasia*-centered whole transcriptome comparison between symbiotic and  
66 aposymbiotic animals was performed by Lehnert et al.<sup>24</sup>. Since then, multiple studies on the  
67 *Aiptasia-Symbiodinium* symbiosis have explored different aspects of this relationship and raised  
68 several interesting hypotheses<sup>2, 25</sup>. Despite this increasing wealth of information, our knowledge  
69 of underlying key genes associated with this relationship is still limited. While transcriptomic  
70 studies have provided valuable information, the resulting lists of putative candidate genes  
71 contain thousands of genes, making it difficult to disentangle true symbiosis-related signals from  
72 other experimental and technical factors. Furthermore, it was difficult to contrast results across  
73 studies due to the lack of a reference genome when most of the studies were carried out. The  
74 recent availability of the *Aiptasia* genome<sup>2</sup> provides a set of high-quality gene models as a  
75 reference for transcriptomic analyses. RNA-Seq data can now be mapped directly to these gene  
76 models for quantification, thus allowing the comparison of results across different studies.  
77 Here, we carried out a meta-analysis of four RNA-Seq datasets comparing expression differences  
78 between symbiotic and aposymbiotic *Aiptasia* (strain CC7) in order to discern sources of  
79 technical errors and experimental variations, and to identify a core set of genes and pathways  
80 involved in symbiosis establishment and maintenance.

81

## 82 Results

83 We conducted our meta-analysis on 3 previous RNA-Seq studies that generated 4 separate  
84 datasets, encompassing 17 biological replicates per symbiosis state (i.e., aposymbiotic and  
85 symbiotic)<sup>2, 24, 26</sup>.

86  
87 **Batch effects.** In this study, we focused solely on the annotated genes of the previously  
88 published *Aiptasia* genome<sup>2</sup>. To investigate the relationship between samples from different  
89 studies, we first performed a principal component analysis (PCA) and a rank correlation analysis  
90 (RCA) on inter-sample normalized transcripts per million (TPM) values. Both the PCA (Fig. 1A)  
91 and RCA (Fig. 1B) showed clear grouping of samples by experiment rather than symbiotic state.  
92 However, PCA performed on samples from individual studies showed a clear separation of the  
93 samples by symbiotic condition (Fig. S1). This indicates that technical and/or experimental batch  
94 effects from each study exert stronger effects on gene expression profiles than the actual  
95 symbiotic state of the animals.

96

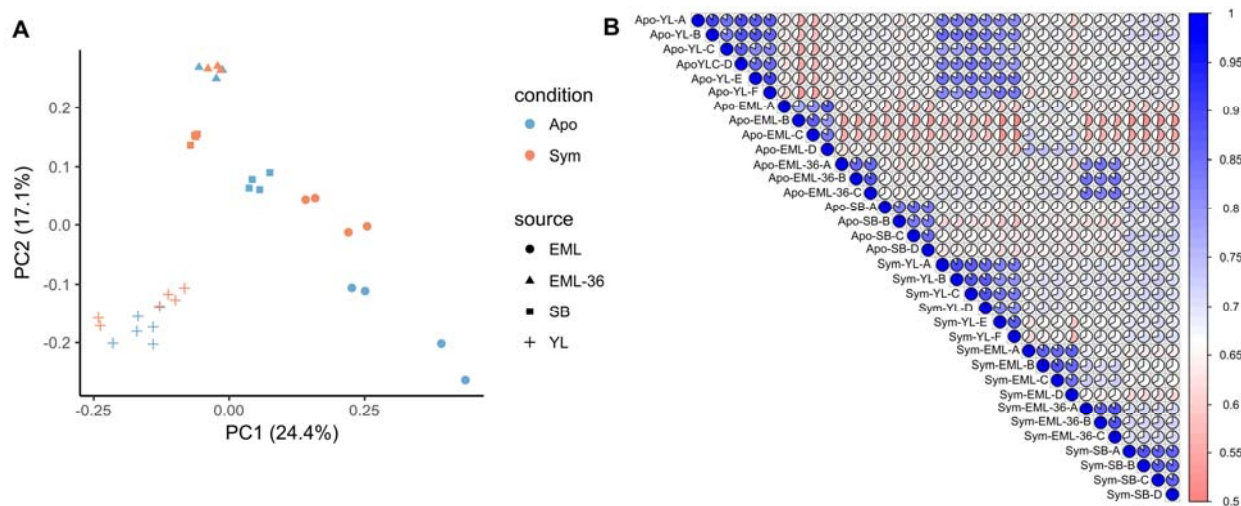

97

98 **FIG 1** Relationship between samples from different studies. (A) Principal component analysis of  
99 samples across all four studies. The symbiotic state (condition) of the animals was indicated by  
100 the color of the points, while the source studies were represented as different shapes. (B) Kendall  
101 rank correlation of all samples, with high-correlation as blue, and low-correlation as red. The pie  
102 chart in each cell also indicates the correlation of the two samples from the corresponding row  
103 and column. In both figures, Apo and Sym represent the symbiotic state of the anemones:  
104 aposymbiotic and symbiotic, respectively. YL, SB, EML, and EML-36 are the initials of the first  
105 authors whose papers we obtained the RNA-Seq data (i.e. Yong Li<sup>26</sup>, Sebastian Baumgarten<sup>2</sup>,  
106 and Erik M. Lehnert<sup>24</sup>, respectively).

107  
108 **Differential expression analyses.** Although the four datasets were distinct, there was still a clear  
109 separation of symbiotic and aposymbiotic replicates within each of the datasets. We  
110 hypothesized that this separation was due to the differential expression of core genes involved in  
111 symbiosis initiation and/or maintenance. To identify these genes, we performed four independent  
112 differential expression analyses using the exact same pipeline and parameters. These analyses  
113 identified between 2,398 to 11,959 differentially expressed genes (DEGs), corresponding to  
114 ~10–50% of all expressed genes in the respective studies (Table 1). Surprisingly, the overlap  
115 between these lists of DEGs was poor despite the large number of DEGs identified in the  
116 individual analyses: only 300 genes were consistently differentially expressed across all four  
117 studies. Out of these 300 genes, 166 were upregulated in symbiotic anemones in all comparisons,  
118 while 134 were found to be downregulated in symbiotic animals, relative to aposymbiotic  
119 controls (Table 1). Paradoxically, we also found 93 genes of 393 genes (23.7%) that were

120 differentially expressed in all studies, but in different directions. At this point, we sought a better  
121 technique to identify the core genes involved in symbiosis.

122  
123 **TABLE 1** Number of differentially expressed genes in different analyses. “Upregulated” and  
124 “downregulated” refers to the number of genes that are expressed at higher levels and lower  
125 levels respectively in symbiotic *Aiptasia*, relative to aposymbiotic ones.

| Study         | Expressed | DEGs   | Upregulated | Downregulated |
|---------------|-----------|--------|-------------|---------------|
| YL            | 27,684    | 3,058  | 1,552       | 1,506         |
| SB            | 24,013    | 11,959 | 6,072       | 5,887         |
| EML           | 24,511    | 9,613  | 4,758       | 4,855         |
| EML-36        | 24,246    | 2,398  | 1,241       | 1,157         |
| Overlap       | 22,394    | 393    | 166         | 134           |
| Meta-analysis | 25,857    | 731    | 366         | 365           |

126  
127  
128 **Performing a meta-analysis across four datasets.** To obtain a more robust set of core genes  
129 involved in symbiosis, we performed a meta-analysis with random effects across the four  
130 independent differential gene expression analyses (Table S1). Using this approach, we identified  
131 731 genes that exhibited a more consistent response to symbiosis.

132 To assess the robustness of these genes, we carried out a principal variance component analysis  
133 (PVCA)<sup>27</sup> to detect the connections between the expression profiles and the different  
134 experimental parameters used in each study (Fig. 2, Table S2). For the four individual studies,  
135 we found that the symbiotic state of the anemones accounts for a relatively small fraction (6.5%  
136 in raw data, 8.4% in normalized data) of the observed variance. Most of the variance was  
137 introduced by differences in feeding frequency, days between feeding and sampling, water, light  
138 intensity, and temperature. We further noticed that a large proportion of the variance across these  
139 four datasets remained unaccountable, suggesting that technical variability, e.g. RNA extraction,

140 library preparation and sequencing, also introduces substantial unwanted heterogeneity to gene  
141 expression profiles. When the PVCA was similarly applied to the 731 genes identified through  
142 our meta-analysis, we observed that these genes had a significantly enhanced association with  
143 symbiosis. Symbiosis state accounted for 46.6% of the expression variance observed in these  
144 genes (Fig 2).

145 We noticed that smaller gene lists tended to have variances that were better explained by  
146 symbiosis state, exemplified by DEG\_YL and DEG\_EML-36 having better association with  
147 symbiosis than DEG\_SB and DEG\_EML. Thus, one could argue that the meta-analysis merely  
148 achieved better association with symbiosis as it had the fewest genes of interest. To assess this  
149 confounding factor, we performed PVCA on a set of randomly picked 731 genes from DEG\_YL.  
150 This was repeated 10,000 times (i.e., a Monte-Carlo approach), and for other DEG lists  
151 (DEG\_SB, DEG\_EML and DEG\_EML-36). These simulations allowed us to estimate that the  
152 likelihood of our meta-analysis producing the observed 46.6% by random chance was  $p < 10^{-4}$  (0  
153 of 40,000 trials had symbiosis state accounting for > 46.6% of the variance).

154



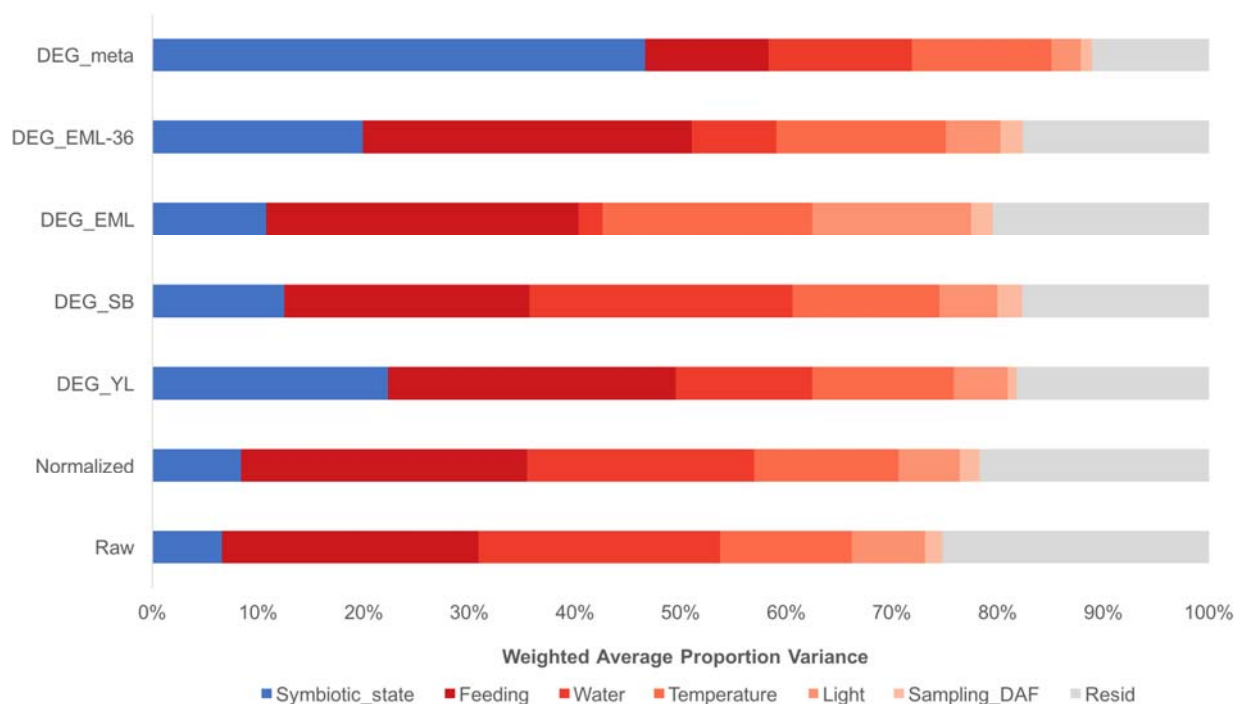

155  
156 **FIG 2** Principal variance component analysis of DEGs from different analyses. The contribution  
157 of each factor to the overall variance in each analysis was estimated by PVCA. The variance  
158 explained by symbiotic state (blue) is highest in the set of DEGs from the meta-analysis  
159 (DEG\_meta); the combined variation attributable to experimental factors (red) is lowest in  
160 DEG\_meta as well. Unresolved variance is in gray. DEG\_YL, \_SB, \_EML and \_EML-36  
161 represents the set of differentially expressed genes identified in four independent differential  
162 analyses. Raw and Normalized are the combined raw and inter-sample normalized expression  
163 data across all *Aiptasia* genes, showing that < 10% of the variation in overall gene expression  
164 can be attributed to symbiotic state. DAF: days after feeding.  
165

166 **Functional interpretation.** To assess the impact of the previously identified experiment-specific  
167 biases, we conducted GO and KEGG pathway enrichment analyses on the DEGs identified using  
168 the four independent differential gene expression analyses, respectively. Across the analyses of  
169 four independent experiments, 283–645 GO terms and 9–55 KEGG pathways were enriched.  
170 However, the functional overlap across all studies was poor: a large proportion of the putatively  
171 enriched terms were only identified in a single dataset (~75% in GO, and ~65% in KEGG) (Fig.  
172 S2). Compared to these independent analyses, the GO and KEGG pathway enrichment of the 731  
173 symbiosis-associated core genes contained fewer significant GO terms (204), but comparatively  
174 more significantly enriched KEGG pathways (31). Many of the enriched GO terms and KEGG  
175 pathways, as well as their associated genes, fit well with processes previously reported to be  
176 involved in symbiosis, including symbiont recognition and the establishment of symbiosis, host  
177 tolerance of symbiont, and nutrient exchange between partners and host metabolism which are  
178 discussed separately (Supplementary Information S1). However, our analysis also identified  
179 several symbiosis-related processes that were previously overlooked; of these processes,  
180 pathways associated with amino acid metabolism exhibited the most extensive changes in  
181 response to symbiosis.

182 **Extensive changes of amino acid metabolism in response to symbiosis.** Amino acid and  
183 protein metabolism represented a major symbiosis-related aspect in our meta-analysis. 9 of 31  
184 enriched KEGG pathways and 18 of 125 enriched biological process GO terms were associated  
185 with amino acid and/or protein metabolism (Fig. 3). A total of 97 DEGs were involved in these  
186 processes, of which 43 were upregulated in symbiotic animals. Interestingly, the DEGs involved  
187 in most of the enriched biological processes exhibited consistent expression changes (Fig. 3A),  
188 i.e. the genes associated with the corresponding process were either exclusively upregulated or  
189 downregulated.  
190

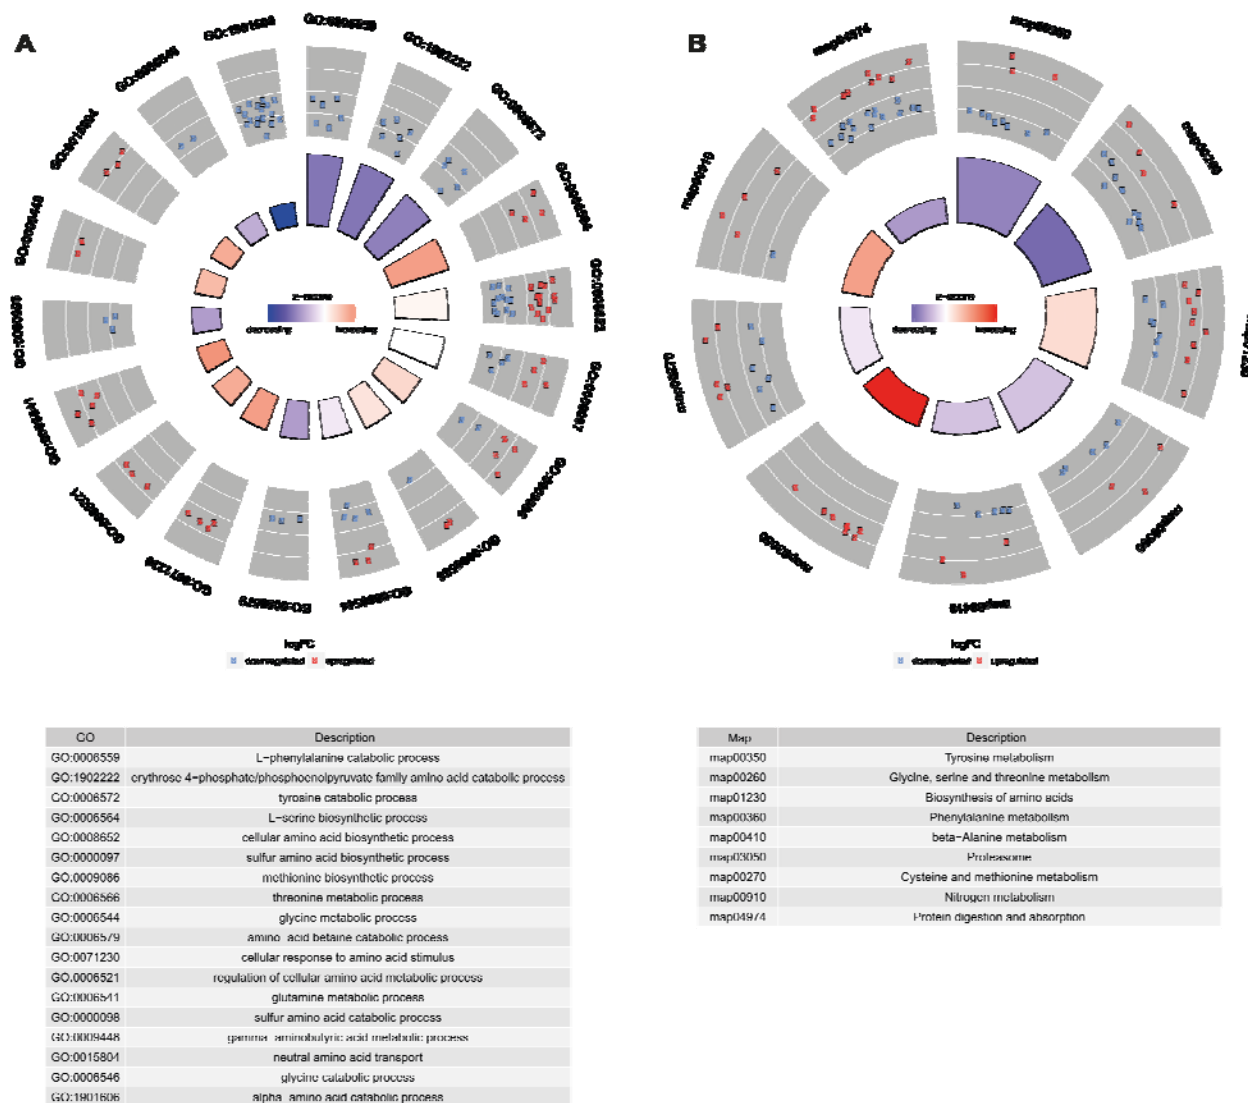

191  
 192 **FIG 3** Amino acid metabolism biological processes (A) and pathways (B) enriched with DEGs  
 193 identified in meta-analysis. For the two Circos plots, the height of each bar in the inner circle  
 194 indicates statistical significance of the enriched GO terms (A) and KEGG pathways (B), while  
 195 color of the bars represents the overall regulation effect of each process. The outer circle shows  
 196 the differential expression of genes associated with each process, where red and blue represent  
 197 upregulation and downregulation in symbiotic anemones, respectively. The table describes the  
 198 annotation of each term or pathway.

199

200 Further integration of these enriched biological processes and pathways revealed an amino acid  
201 metabolism hub in *Aiptasia-Symbiodinium* symbiosis (Fig. 4). We observed that genes catalyzing  
202 glycine/serine biosynthesis from food-derived choline were systematically downregulated in  
203 symbiotic anemones. In contrast, the genes involved in *de novo* serine biosynthesis from 3-  
204 phosphoglycerate, one of the glycolysis intermediates, and glutamine/glutamate metabolism  
205 were generally upregulated (Fig. 4A). The resulting change in amino acid synthesis pathways  
206 suggested that symbiotic hosts utilize glucose and waste ammonium to synthesize serine and  
207 glycine, which are both main precursors for many other amino acids (Supplementary Information  
208 S1). Based on these findings, we hypothesized that the host uses symbiont-derived glucose to  
209 assimilate waste ammonium to produce amino acids.

210 To test this hypothesis, we further investigated metabolomes of symbiotic and aposymbiotic  
211 anemones using nuclear magnetic resonance (NMR) spectroscopy. Three metabolites in the *de*  
212 *novo* serine biosynthesis pathway were highly abundant in symbiotic *Aiptasia* (two of them  
213 significantly so,  $p < 0.05$ ), while five out of the six intermediates in the alternative glycine/serine  
214 biosynthesis pathway using food-derived choline were significantly enriched in aposymbiotic  
215 anemones as predicted (Fig. 4B). However, as glucose produces multiple peaks in the  $^1\text{H}$  NMR  
216 spectrum, and most of these peaks overlap with many other potential metabolites in both  
217 symbiotic and aposymbiotic anemones, it was not possible to precisely determine glucose  
218 concentrations via NMR. Consequently, we performed  $^{13}\text{C}$  bicarbonate labeling experiments and  
219 compared metabolite profiles of symbiotic and aposymbiotic anemones using gas  
220 chromatography-mass spectrometry (GC-MS), in order to test if the glucose is indeed provided  
221 by the symbiont and if the downstream usage of symbiont derived organic carbon is in the host.  
222 Our experiments confirmed that symbionts provide large amounts of  $^{13}\text{C}$ -labeled glucose to the

223 host (Fig. S3) and that the  $^{13}\text{C}$ -labeling was significantly enriched in many amino acids and their  
224 precursors in symbiotic anemones compared to aposymbiotic ones (Table S2). Moreover,  
225 metabolite set enrichment analysis indicates that these  $^{13}\text{C}$ -enriched are associated mainly with  
226 several amino acid metabolism pathways (Fig. S4), which is consistent with the enrichment  
227 analysis of 731 differentially expressed genes. For the amino acids with good abundance in both  
228 symbiotic and aposymbiotic animals, we examined the proportion of  $^{13}\text{C}$  in each of them,  
229 respectively. Interestingly, we observed relatively stable increases (~1.5-fold) of  $^{13}\text{C}$  levels in  
230 symbiotic animals compared with aposymbiotic ones (Fig. 4C). This constant increase may  
231 indicate there is a unique carbon source (photosynthesis-produced glucose) rather than multiple  
232 sources (glucose and symbiont-derived amino acids) in host amino acid biosynthesis.  
233

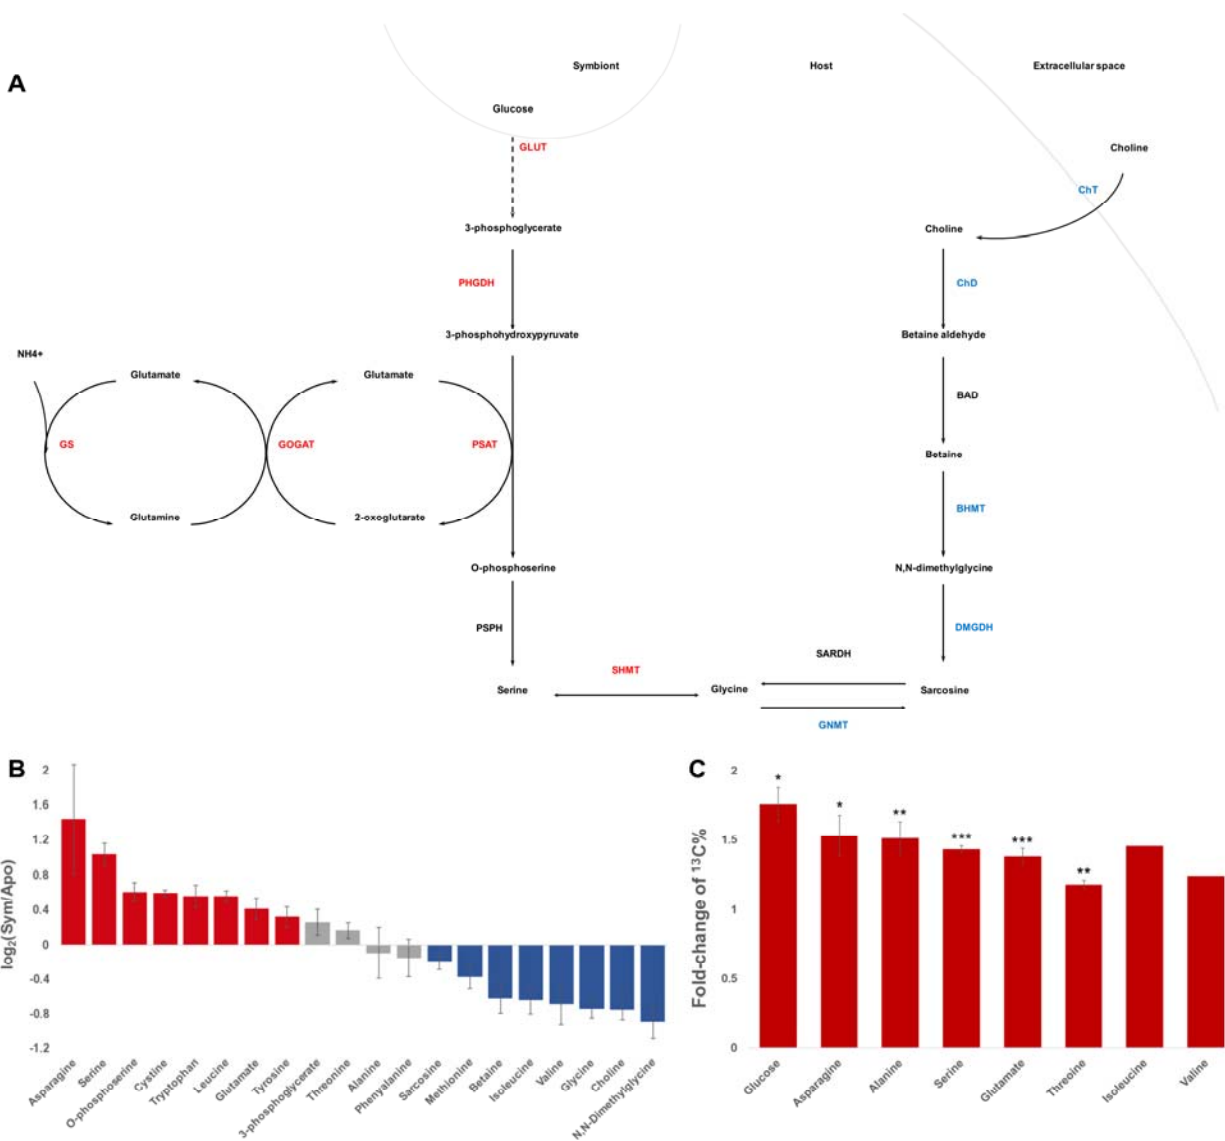

234  
 235 **FIG 4** Amino acid metabolism in *Aiptasia-Symbiodinium* symbiosis. (A) Serine biosynthesis in  
 236 *Aiptasia* with different symbiotic states. The pathway on the left indicates *de novo* serine  
 237 biosynthesis from symbiont-produced glucose, while the right part represents glycine/serine  
 238 biosynthesis from food-derived choline. Enzyme names are colored to indicate differential  
 239 expression of the corresponding genes, where red and blue mean upregulation and  
 240 downregulation in symbiotic anemones, respectively. (B) Metabolite abundance changes in  
 241 response to symbiosis. Color represent abundance changes, with red for significant increases in  
 242 symbiotic anemones, blue for significant increase in aposymbiotic animals, and gray for non-

243 significant changes. (C) Increasing  $^{13}\text{C}$  proportion of glucose and amino acids in symbiotic  
244 *Aiptasia*. Asterisks denote statistical significance of the changes (two-tail  $t$  test: \*  $p < 0.05$ , \*\*  $p$   
245  $< 0.01$ , \*\*\*  $p < 0.001$ ). Statistical testing of isoleucine and valine was not possible as they were  
246 detected in only one aposymbiotic replicate with reasonable concentration. Error bar represents  
247 standard error of the mean.

248

## 249 **Discussion**

250 Batch effects are known to introduce strong variation in high throughput sequencing studies<sup>28, 29</sup>.  
251 However, this is often overlooked in transcriptomic studies, and especially so in non-model  
252 organisms. Our analysis of RNA-Seq data from four independent experiments analyzing  
253 transcriptional changes between symbiotic and aposymbiotic *Aiptasia* highlighted that batch  
254 effects are indeed pervasive in published data, even among studies using the same genotype  
255 (clonal strain CC7). Analyses of the combined dataset from all four experiments showed clear  
256 grouping of samples by experiment rather than treatment. However, when each experiment was  
257 analyzed independently, replicates separated by symbiotic states as expected. Interestingly, we  
258 found that the observed batch effects were not restricted to technical biases. Our analyses  
259 showed that the specific experimental setups in each study were a greater source of variance than  
260 the symbiosis state, which was the actual factor of interest in these studies. More importantly, we  
261 found that genes closely related to the processes involved in symbiosis, such as nutrient  
262 exchanges, may also respond significantly to various parameters of culture conditions, such as  
263 the feeding frequency, days between sampling and feeding, water, light intensity, and the  
264 temperature. Without careful design, such factors may exert effects on gene expression that mask  
265 the changes specific to the treatment of interest (symbiotic state).



266 Based on our findings, we suggest two potential venues to reduce the high signal-to-noise ratio in  
267 differential expression studies. Firstly, future transcriptomic efforts should take extreme care to  
268 standardize all experimental conditions save for the one under study. For example, culture  
269 conditions should be identical, treatments should be performed on multiple independent batches,  
270 RNA extractions and library preparation should be carried out on all samples simultaneously.  
271 The prepared libraries should also be sequenced in the same run to further minimize technical  
272 variations. Secondly, one should not dogmatically adhere to the convention of using  $p = 0.05$  as  
273 the cutoff for statistical significance. If a study considers one in every three genes as significantly  
274 differentially expressed, to a careful reader, the proclaimed significance of those genes is  
275 diminished. As the number of DEGs increase, the rate of type I errors would also increase, which  
276 would make the discovery of meaningful biological processes more difficult.

277 From the functional interpretation of DEGs associated with enriched GO terms and KEGG  
278 pathways, we found that many processes in the host were significantly induced or suppressed in  
279 response to symbiosis. One of the key features that has been overlooked in previous studies is the  
280 switch of serine biosynthesis pathways in *Aiptasia* in response to symbiosis.

281 The downregulation of choline transport indicates a decrease of the host's demand on dietary  
282 choline during symbiosis. Correspondingly, genes involved in the downstream conversion of  
283 choline to betaine and the production of glycine from betaine are also downregulated. The  
284 decrease of glycine caused by this downregulation is likely compensated by the metabolism of  
285 serine, which can be achieved by the observed upregulation of serine hydroxymethyltransferase  
286 (SHMT, AIPGENE4781), which catalyzes the interconversions between glycine and serine.  
287 Interestingly, our results suggest that serine is one of the key components in the amino acid  
288 interconversions, as the genes involved in its *de novo* biosynthesis from 3-phosphoglycerate (one

289 of the intermediates of glycolysis) were consistently upregulated. The conversion from glutamate  
290 to 2-oxoglutarate, catalyzed by the upregulated phosphoserine aminotransferase (PSAT,  
291 AIPGENE17104), may serve as the main reaction to provide amino groups for the biosynthesis  
292 of amino acids. Since 2-oxoglutarate is also one of the intermediates in the citrate acid cycle, an  
293 increase of glucose provided by the symbionts may also increase the overall activity of the cycle,  
294 hence raising the relative abundance of 2-oxoglutarate in symbiotic animals. High levels of 2-  
295 oxoglutarate have been reported to induce ammonium assimilation through glutamine synthetase  
296 / glutamate synthase cycle<sup>30</sup>. Consistent with this finding, we observe all the genes involved in  
297 this pathway to be upregulated in symbiotic anemones.

298 Metabolomic analyses of symbiotic and aposymbiotic anemones confirm the predictions derived  
299 from our transcriptomic meta-analysis. Most of the intermediates in the *de novo* serine  
300 biosynthesis using symbiont-derived glucose were highly enriched in symbiotic anemones and  
301 showed increased <sup>13</sup>C-labeling, whereas many of the metabolites from choline-betaine-glycine-  
302 serine conversion have decreased abundance in symbiotic animals. Furthermore, we also  
303 identified many other amino acids showing significantly increased abundance and <sup>13</sup>C-labeling  
304 signals, suggesting that serine may serve as metabolic intermediate for the production of other  
305 amino acids. Taken together, these results highlight that symbiont-derived glucose fuels  
306 ammonium assimilation and amino acid production in the host and that serine biosynthesis acts  
307 as a main metabolic hub in symbiotic hosts.

308 The strong shifts in host amino acids metabolic pathways induced by symbiont-provided glucose  
309 described here indicate the major nitrogen and carbon sources of the anemone host, and their  
310 interactions in the *Aiptasia-Symbiodinium* symbiosis. The catabolism of glucose through  
311 pathways such as glycolysis, pentose phosphate pathway, and citric acid cycle, not only

312 generates more energy (in forms of ATP, NADH, and NADPH), which is critical to ammonium  
313 assimilation, but also produces more intermediate metabolites that can serve as carbon  
314 backbones in many biosynthetic pathways such as amino acid synthesis. Our findings thus  
315 highlight nitrogen conservation, i.e. the host driven assimilation of waste ammonium using  
316 symbiont-derived carbon, as a central mechanism of the cnidarian-algal endosymbiosis<sup>16</sup>. This  
317 metabolic interaction might serve as a self-regulating mechanism for the host to control symbiont  
318 density through the regulation of nitrogen availability<sup>15</sup> in a carbon dependent manner. This  
319 allows for higher nitrogen availability in early stages of infection (few symbionts translocating  
320 few carbon) and gradual reduction of nitrogen availability with increasing symbiont densities  
321 (many symbionts translocating more carbon). The strict dependence of this mechanism on  
322 symbiont-derived carbon highlights the sensitivity of this relationship to changes in carbon  
323 translocation as imposed by stress-induced retention of photosynthates by symbionts<sup>31, 32</sup>.  
324

## 325 **Materials and Methods**

326 **Data collection and pre-processing.** Based on literature review of recently published *Aiptasia*  
 327 genome and transcriptome studies, four datasets generated from three previous publications<sup>2, 24, 26</sup>  
 328 were obtained (Table 1). All RNA-Seq experiments were performed on the clonal *Aiptasia* strain  
 329 (CC7) and sequenced on the same platform (Illumina HiSeq 2000). Three of the datasets  
 330 contained 101 bp paired-end reads, while the last one contained 36 bp single-end reads. Samples  
 331 were labeled based on the initials of the first author of published papers and ongoing project.  
 332 As all raw data from Lehnert et al.<sup>24</sup> was provided as a monolithic FASTQ file, a custom Python  
 333 script was written to split the reads into its constituent replicates, as inferred from the FASTQ  
 334 annotation lines.

335

336 **Table 1** Summary of the NGS data sources used in this study

| Sample                          | Source Project                                                                                                          | Symbiont                             | Library               | Accession Number                                        |
|---------------------------------|-------------------------------------------------------------------------------------------------------------------------|--------------------------------------|-----------------------|---------------------------------------------------------|
| <b>Apo-YL</b> <sup>26</sup>     |                                                                                                                         | None                                 | 101-bp,<br>paired-end |                                                         |
| <b>Sym-YL</b> <sup>26</sup>     |                                                                                                                         | Symbiodinium<br>SSB01                | 101-bp,<br>paired-end |                                                         |
| <b>Apo-SB</b> <sup>2</sup>      | <i>Aiptasia</i><br>genome,<br><a href="https://www.ncbi.nlm.nih.gov/nuccore/PRJNA261862">PRJNA261862</a>                | None                                 | 101-bp,<br>paired-end | SRR1648359,<br>SRR1648360,<br>SRR1648361,<br>SRR1648362 |
| <b>Sym-SB</b> <sup>2</sup>      | <i>Aiptasia</i><br>genome,<br><a href="https://www.ncbi.nlm.nih.gov/nuccore/PRJNA261862">PRJNA261862</a>                | Symbiodinium<br>SSB01                | 101-bp,<br>paired-end | SRR1648369,<br>SRR1648370,<br>SRR1648371,<br>SRR1648372 |
| <b>Apo-EML</b> <sup>24</sup>    | <i>Aiptasia pallida</i><br>Transcriptome,<br><a href="https://www.ncbi.nlm.nih.gov/nuccore/PRJNA159215">PRJNA159215</a> | None                                 | 101-bp,<br>paired-end | SRR696732                                               |
| <b>Sym-EML</b> <sup>24</sup>    | <i>Aiptasia pallida</i><br>Transcriptome,<br><a href="https://www.ncbi.nlm.nih.gov/nuccore/PRJNA159215">PRJNA159215</a> | Native <i>Symbiodinium</i><br>strain | 101-bp,<br>paired-end | SRR612165                                               |
| <b>Apo-EML-36</b> <sup>24</sup> | <i>Aiptasia pallida</i><br>Transcriptome,<br><a href="https://www.ncbi.nlm.nih.gov/nuccore/PRJNA159215">PRJNA159215</a> | None                                 | 36-bp, single-<br>end | SRR612167                                               |

---

|                                |                                                                          |                                      |                       |           |
|--------------------------------|--------------------------------------------------------------------------|--------------------------------------|-----------------------|-----------|
| <b>Sym-EML-36<sup>24</sup></b> | <i>Aiptasia pallida</i><br>Transcriptome,<br><a href="#">PRJNA159215</a> | Native <i>Symbiodinium</i><br>strain | 36-bp, single-<br>end | SRR612166 |
|--------------------------------|--------------------------------------------------------------------------|--------------------------------------|-----------------------|-----------|

---

337

338 **Identification of DEGs.** To avoid biases stemming from the use of disparate bioinformatics  
339 tools in calling DEGs, data from the four datasets were processed with identical analytical  
340 pipelines.

341 Gene expressions were quantified (in TPM, transcripts per million) based on the published  
342 *Aiptasia* gene models<sup>2</sup> using kallisto v0.42.4<sup>33</sup>. DEGs were independently identified in the four  
343 datasets using sleuth v0.28.0<sup>34</sup>. Genes with corrected  $p$  values  $< 0.05$  were considered  
344 differentially expressed.

345 To enable direct comparisons of gene expression values between datasets, another normalization  
346 with sleuth was carried out on all samples ( $n = 17$  aposymbiotic and  $n = 17$  symbiotic). Principal  
347 component analysis (PCA) and ranked correlation analysis (RCA) were carried out on these  
348 normalized expression values to assess the relationship between samples and reproducibility of  
349 these studies.

350 **Profiling sources of batch effects.** Principal variance components analysis (PVCA), a technique  
351 that was developed to estimate the extent of batch effects in microarray experiments<sup>27</sup>, was used  
352 several times in our study. A PVCA was carried out on raw data to estimate the batch effects in  
353 the combined dataset and their possible source in the original experimental designs; similarly, the  
354 normalized data was also assessed for the reduction of batch effects post-normalization. We also  
355 performed PVCA on normalized expression values of the differentially expressed genes (DEG)  
356 identified in each independent analysis or the final meta-analysis to detect the robustness of DEG  
357 calling.

358 **Meta-analysis across studies.** For every gene with at least two studies with significant  
359 differential expression values, a meta-analysis was performed to determine the overall effect size  
360 and associated standard error. Effect sizes from each study  $i$  (represented as  $w_i$ ) were calculated  
361 as the natural logarithm of its expression ratio ( $\ln R_i$ ), i.e. geometric means of all expression  
362 values in the aposymbiotic state divided by the geometric means of all expression values in the  
363 symbiotic state. Conveniently, this value is approximately equal to the  $\beta_i$  value provided by  
364 sleuth. As sleuth also calculates the standard error of  $\beta_i$ , the variance of  $\ln R_i$  was not calculated  
365 via the typical approximation—instead, the variance  $v_i$  was directly calculated as

$$v_i = SE_{\beta_i}^2 \cdot n_i$$

366 where  $n_i$  represents the number of replicates in study  $i$ .

367 To combine the studies, a random-effects model was used. While the use of this model is  
368 somewhat discouraged for meta-analyses with few studies as it is prone to produce type I errors<sup>35</sup>,  
369 we still opted for its use over the fixed-effects model due to the substantial inter-study variation  
370 evident in the PCAs performed previously. Also, the type I error rate could be controlled by  
371 setting a more conservative  $p$  threshold, if required.

372 The DerSimonian and Laird<sup>36</sup> method was implemented as described below. Studies with  
373 individual effect sizes  $m_i$  were weighted ( $w^*$ ) by a combination of the between-study variation  
374 ( $\tau^2$ ) and within-study variation ( $v_i$ ), according to the formula

$$w_i^* = \frac{1}{v_i + \tau^2}$$

375 The between-study variation ( $\tau^2$ ) across all  $k$  studies was calculated as

$$\tau^2 = \max\left\{\frac{Q - df}{C}, 0\right\}$$

376 where

$$Q = \sum w_i (T_i - \bar{T})^2$$

$$C = \sum w_i - \frac{\sum w_i^2}{\sum w_i}$$

377 The weighted mean ( $m^*$ ) was calculated as

$$m^* = \frac{\sum w_i^* T_i}{\sum w_i^*}$$

378 while the standard error of the combined effect was

$$SE(m^*) = \frac{1}{\sqrt{\sum w_i^*}}$$

379 The two-tailed p-value was calculated using

$$p = 2 \left[ 1 - \Phi\left(\left|\frac{m^*}{SE(m^*)}\right|\right)\right]$$

380 and then subsequently corrected for multiple hypothesis testing with the Benjamini-Hochberg-  
381 Yekutieli procedure<sup>37, 38</sup> using a Python script. Genes with corrected  $p < 0.05$  were considered  
382 differentially expressed. For transparency, calculations for all equations were implemented  
383 manually in Microsoft Excel (Table S3) following established guidelines<sup>39</sup>.

384 **Functional interpretation of DEGs.** Gene ontology (GO) and KEGG pathway enrichment  
385 analyses were both conducted on five DEG lists: one each from the four independent datasets,  
386 and one from the results of the meta-analysis.

387 Identification of enriched GO terms were conducted using topGO<sup>40</sup> by a self-developed R script  
388 ([https://github.com/lyijin/topGO\\_pipeline](https://github.com/lyijin/topGO_pipeline)). A GO term was considered enriched only when its *p*  
389 value was less than 0.05.

390 KEGG pathway enrichment analyses were performed using Fisher's exact and subsequent  
391 multiple testing correction via false discovery rate (FDR) estimation. A KEGG pathway was  
392 deemed enriched (or depleted) only when its FDR less than 0.05. The results of enrichment  
393 analyses were visualized using GOplot<sup>41</sup>.

394 **Metabolomic profiles of symbiotic and aposymbiotic anemones.** *Aiptasia* strain CC7 was  
395 bleached and re-infected with a compatible strain of *Symbiodinium* SSB01 as previously  
396 reported<sup>2</sup>. All the symbiotic and aposymbiotic anemones were maintained in the laboratory in  
397 autoclaved seawater (ASW) at 25 °C in 12-hour light/12-hour dark cycle with light intensity of  
398 ~30  $\mu\text{mol photons m}^{-2}\text{s}^{-1}$  for over three years. Anemones were fed three times a week with  
399 freshly hatched *Artemia* nauplii, and water change was done on the day after feeding.

400 Anemones were rinsed extensively to remove any external contaminations, and starved for two  
401 days in ASW and transferred into ASW with 10 mM <sup>13</sup>C-labelled sodium bicarbonate (Sigma-  
402 Aldrich, USA) for another two days before sampling. The four-day starvation period ensured all  
403 *Artemia* had been digested and consumed, hence there was no contamination from *Artemia* in the  
404 samples for NMR and GC-MS. The samples were drained completely on clean tissues to remove  
405 any water on surface, then snap frozen in liquid nitrogen to avoid any further metabolite changes  
406 in downstream processing.



407 To compare metabolomic profiles of anemones at different symbiotic states, four replicates of  
408 each state ( $n = 30$  individuals per replicate), were processed for metabolite extraction using a  
409 previously reported methanol/chloroform method<sup>42</sup>. The free amino acid-containing methanol  
410 phase was dried using CentriVap Complete Vacuum Concentrators (Labconco, USA).  
411 For NMR metabolite profiling, samples were dissolved in 600  $\mu$ l of deuterated water ( $D_2O$ ), and  
412 vortexed vigorously for at least 30 seconds. Subsequently, 550  $\mu$ L of the solution was transferred  
413 to 5 mm NMR tubes. NMR spectrum was recorded using 700 MHz AVANCE III NMR  
414 spectrometer equipped with Bruker CP TCI multinuclear *CryoProbe* (BrukerBioSpin, Germany).  
415 To suppress any residual HDO peak, the  $^1H$  NMR spectrum were recorded using excitation  
416 sculpting pulse sequence (zgesgp) program from Bruker pulse library. To achieve a good signal-  
417 to-noise ratio, each spectrum was recorded by collecting 512 scans with a recycle delay time of 5  
418 seconds digitized into 64 K complex data points over a spectral width of 16 ppm. Chemical shifts  
419 were adjusted using 3-trimethylsilylpropane-1-sulfonic acid as internal chemical shift reference.  
420 Before Fourier transformations, the FID values were multiplied by an exponential function  
421 equivalent to a 0.3 Hz line broadening factor. The data was collected and quantified using Bruker  
422 Topspin 3.0 software (Bruker BioSpin, Germany), with metabolite-peak assignment using  
423 Chenomx NMR Suite v8.3, with an up-to-date reference library (Chenomx Inc., Canada).  
424 For  $^{13}C$ -labelling investigation using GC-MS, dried samples were re-dissolved in 50  $\mu$ l of  
425 Methoxamine (MOX) reagent (Pierce, USA) at room temperature and derivatized at 60  $^{\circ}C$  for  
426 one hour. 100  $\mu$ l of *N,O*-bis-(trimethylsilyl) trifluoroacetamide (BSTFA) was added and  
427 incubated at 60  $^{\circ}C$  for further 30 min. 2  $\mu$ l of the internal standard solution of fatty acid methyl  
428 ester (FAME) were then spiked in each sample and centrifuged for 5 min at 10,000 rpm. 1  $\mu$ l of  
429 the derivatized solution was analyzed using single quadrupole GC-MS system (Agilent 7890

430 GC/5975C MSD) equipped with EI source at ionization energy of 70 eV. The temperature of the  
431 ion source and mass analyzer was set to 230 °C and 150 °C, respectively, and a solvent delay of  
432 9.0 min. The mass analyzer was automatically tuned according to manufacturer's instructions,  
433 and the scan was set from 35 to 700 with scan speed 2 scans/s. Chromatography separation was  
434 performed using DB-5MS fused silica capillary column (30m x 0.25 mm I.D., 0.25 µm film  
435 thickness; Agilent J&W Scientific, USA), chemically bonded with 5% phenyl 95%  
436 methylpolysiloxane cross-linked stationary phase. Helium was used as the carrier gas with  
437 constant flow rate of 1.0 ml min<sup>-1</sup>. The initial oven temperature was held at 80°C for 4 min, then  
438 ramped to 300 °C at a rate of 6.0 °C min<sup>-1</sup>, and held at 300 °C for 10 min. The temperature of  
439 the GC inlet port and the transfer line to the MS source was kept at 200 °C and 320 °C,  
440 respectively. 1 µl of the derivatized solution of the sample was injected into split/splitless inlet  
441 using an auto sampler equipped with 10 µl syringe. The GC inlet was operated under splitless  
442 mode. Metabolites in all samples were identified using Automated Mass Spectral Deconvolution  
443 and Identification System software (AMDIS) with the NIST special database 14 (National  
444 Institute of Standards and Technology, USA). The mass isotopomer distributions (MIDs) of all  
445 compounds were detected and their <sup>13</sup>C-labelling enrichment in symbiotic *Aiptasia* were  
446 investigated using MIA<sup>43</sup>. Pathways associated with these <sup>13</sup>C-enriched metabolites were  
447 explored using MetaboAnalyst v3.0<sup>44</sup>.

448

#### 449 **Author Contributions**

450 M.A. conceived the project. G.C., Y.J.L., M.A., Y.L., N.I.Z., and V.M.E. collected the RNA-Seq  
451 data, performed data analyses, and visualized the results. G.C., N.K., A.E., and M.A. conducted

452 metabolomic experiments and analyzed the data. G.C., Y.J.L., and M.A. wrote the manuscript  
453 with method input from other authors. All authors have read and agreed on the final draft.

454

#### 455 **Acknowledgements**

456 We would like to thank Jit Ern Chen and Maha J. Czielski for valuable comments on our  
457 manuscript. This publication is based upon work supported by the King Abdullah University of  
458 Science and Technology (KAUST) Office of Sponsored Research (OSR) under Award No.  
459 URF/1/2216-01.

460 **References**

- 461 1. Roth MS. The engine of the reef: photobiology of the coral–algal symbiosis. *Microbial*  
462 *Symbioses* **5**, 422 (2014).
- 463
- 464 2. Baumgarten S, *et al.* The genome of *Aiptasia*, a sea anemone model for coral symbiosis.  
465 *Proc Natl Acad Sci U S A* **112**, 11893-11898 (2015).
- 466
- 467 3. Grajales A, Rodriguez E. Morphological revision of the genus *Aiptasia* and the family  
468 *Aiptasiidae* (Cnidaria, Actiniaria, Metridioidea). *Zootaxa* **3826**, 55-100 (2014).
- 469
- 470 4. Lehnert EM, Burriesci MS, Pringle JR. Developing the anemone *Aiptasia* as a tractable  
471 model for cnidarian-dinoflagellate symbiosis: the transcriptome of aposymbiotic *A.*  
472 *pallida*. *BMC Genomics* **13**, 271 (2012).
- 473
- 474 5. Clayton WS, Lasker HR. Individual and population growth in the asexually reproducing  
475 anemone *Aiptasia pallida* Verrill. *J Exp Mar Bio Ecol* **90**, 249-258 (1985).
- 476
- 477 6. Grawunder D, Hambleton EA, Bucher M, Wolfowicz I, Bechtoldt N, Guse A. Induction  
478 of Gametogenesis in the Cnidarian Endosymbiosis Model *Aiptasia* sp. *Sci Rep* **5**, 15677  
479 (2015).
- 480
- 481 7. Kinzie RA, 3rd, Takayama M, Santos SR, Coffroth MA. The adaptive bleaching  
482 hypothesis: experimental tests of critical assumptions. *Biol Bull* **200**, 51-58 (2001).

- 483
- 484 8. Perez S, Weis V. Nitric oxide and cnidarian bleaching: an eviction notice mediates  
485 breakdown of a symbiosis. *J Exp Biol* **209**, 2804-2810 (2006).
- 486
- 487 9. Belda-Baillie CA, Baillie BK, Maruyama T. Specificity of a model cnidarian-  
488 dinoflagellate symbiosis. *Biol Bull* **202**, 74-85 (2002).
- 489
- 490 10. Burriesci MS, Raab TK, Pringle JR. Evidence that glucose is the major transferred  
491 metabolite in dinoflagellate–cnidarian symbiosis. *J Exp Biol* **215**, 3467-3477 (2012).
- 492
- 493 11. Pogoreutz C, Radecker N, Cardenas A, Gardes A, Voolstra CR, Wild C. Sugar  
494 enrichment provides evidence for a role of nitrogen fixation in coral bleaching. *Glob*  
495 *Chang Biol* **23**, 3838-3848 (2017).
- 496
- 497 12. Radecker N, Pogoreutz C, Voolstra CR, Wiedenmann J, Wild C. Nitrogen cycling in  
498 corals: the key to understanding holobiont functioning? *Trends Microbiol* **23**, 490-497  
499 (2015).
- 500
- 501 13. Aranda M, *et al.* Genomes of coral dinoflagellate symbionts highlight evolutionary  
502 adaptations conducive to a symbiotic lifestyle. *Sci Rep* **6**, 39734 (2016).
- 503
- 504 14. Muscatine L, Falkowski PG, Dubinsky Z, Cook PA, McCloskey LR. The Effect of  
505 External Nutrient Resources on the Population Dynamics of Zooxanthellae in a Reef

- 506 Coral. *Proceedings of the Royal Society of London B: Biological Sciences* **236**, 311-324  
507 (1989).  
508
- 509 15. Falkowski PG, Dubinsky Z, Muscatine L, McCloskey L. Population Control in Symbiotic  
510 Corals. *Bioscience* **43**, 606-611 (1993).  
511
- 512 16. Wang J, Douglas AE. Nitrogen recycling or nitrogen conservation in an alga-invertebrate  
513 symbiosis? *J Exp Biol* **201**, 2445-2453 (1998).  
514
- 515 17. Barneah O, Benayahu Y, Weis VM. Comparative proteomics of symbiotic and  
516 aposymbiotic juvenile soft corals. *Mar Biotechnol* **8**, 11-16 (2006).  
517
- 518 18. deBoer ML, Krupp DA, Weis VM. Proteomic and transcriptional analyses of coral larvae  
519 newly engaged in symbiosis with dinoflagellates. *Comp Biochem Physiol Part D*  
520 *Genomics Proteomics* **2**, 63-73 (2007).  
521
- 522 19. Kuo J, Chen M-C, Lin C-H, Fang L-S. Comparative gene expression in the symbiotic and  
523 aposymbiotic *Aiptasia pulchella* by expressed sequence tag analysis. *Biochem Biophys*  
524 *Res Commun* **318**, 176-186 (2004).  
525
- 526 20. Rodriguez-Lanetty M, Phillips WS, Weis VM. Transcriptome analysis of a cnidarian-  
527 dinoflagellate mutualism reveals complex modulation of host gene expression. *BMC*  
528 *Genomics* **7**, 23 (2006).

- 529
- 530 21. Voolstra CR, *et al.* The host transcriptome remains unaltered during the establishment of  
531 coral–algal symbioses. *Mol Ecol* **18**, 1823-1833 (2009).
- 532
- 533 22. Weis VV, Levine R. Differential protein profiles reflect the different lifestyles of  
534 symbiotic and aposymbiotic *Anthopleura elegantissima*, a sea anemone from temperate  
535 waters. *J Exp Biol* **199**, 883-892 (1996).
- 536
- 537 23. Yuyama I, Watanabe T, Takei Y. Profiling differential gene expression of symbiotic and  
538 aposymbiotic corals using a high coverage gene expression profiling (HiCEP) analysis.  
539 *Mar Biotechnol* **13**, 32-40 (2011).
- 540
- 541 24. Lehnert EM, Mouchka ME, Burriesci MS, Gallo ND, Schwarz JA, Pringle JR. Extensive  
542 Differences in Gene Expression Between Symbiotic and Aposymbiotic Cnidarians. *G3:  
543 Genes/Genomes/Genetics* **4**, 277-295 (2014).
- 544
- 545 25. Oakley CA, Ameismeier MF, Peng L, Weis VM, Grossman AR, Davy SK. Symbiosis  
546 induces widespread changes in the proteome of the model cnidarian *Aiptasia*: Symbiosis  
547 and the *Aiptasia* proteome. *Cell Microbiol* **18**, 1009-1023 (2015).
- 548
- 549 26. Li Y, *et al.* DNA methylation regulates transcriptional homeostasis of algal  
550 endosymbiosis in the coral model *Aiptasia*. *bioRxiv*, (2017).
- 551

- 552 27. Li J, Bushel PR, Chu T-M, Wolfinger RD. Principal Variance Components Analysis:  
553 Estimating Batch Effects in Microarray Gene Expression Data. In: *Batch Effects and*  
554 *Noise in Microarray Experiments* (ed<sup>^</sup>(eds). John Wiley & Sons, Ltd (2009).
- 555
- 556 28. Leek JT, *et al.* Tackling the widespread and critical impact of batch effects in high-  
557 throughput data. *Nat Rev Genet* **11**, 733-739 (2010).
- 558
- 559 29. Peixoto L, *et al.* How data analysis affects power, reproducibility and biological insight  
560 of RNA-seq studies in complex datasets. *Nucleic Acids Res* **43**, 7664-7674 (2015).
- 561
- 562 30. Cabello P, Roldan MD, Moreno-Vivian C. Nitrate reduction and the nitrogen cycle in  
563 archaea. *Microbiology* **150**, 3527-3546 (2004).
- 564
- 565 31. Baker DM, Freeman CJ, Wong JCY, Fogel ML, Knowlton N. Climate change promotes  
566 parasitism in a coral symbiosis. *ISME J*, (2018).
- 567
- 568 32. Matthews JL, *et al.* Optimal nutrient exchange and immune responses operate in partner  
569 specificity in the cnidarian-dinoflagellate symbiosis. *Proc Natl Acad Sci U S A* **114**,  
570 13194-13199 (2017).
- 571
- 572 33. Bray NL, Pimentel H, Melsted P, Pachter L. Near-optimal probabilistic RNA-seq  
573 quantification. *Nat Biotechnol* **34**, 525-527 (2016).
- 574



- 575 34. Pimentel H, Bray NL, Puente S, Melsted P, Pachter L. Differential analysis of RNA-seq  
576 incorporating quantification uncertainty. *Nat Methods* **14**, 687-690 (2017).  
577
- 578 35. Guolo A, Varin C. Random-effects meta-analysis: the number of studies matters. *Stat*  
579 *Methods Med Res* **26**, 1500-1518 (2017).  
580
- 581 36. DerSimonian R, Laird N. Meta-analysis in clinical trials. *Control Clin Trials* **7**, 177-188  
582 (1986).  
583
- 584 37. Benjamini Y, Hochberg Y. Controlling the False Discovery Rate: A Practical and  
585 Powerful Approach to Multiple Testing. *Journal of the Royal Statistical Society Series B*  
586 *(Methodological)* **57**, 289-300 (1995).  
587
- 588 38. Benjamini Y, Yekutieli D. The control of the false discovery rate in multiple testing  
589 under dependency. *Ann Stat* **29**, 1165-1188 (2001).  
590
- 591 39. Borenstein M, Hedges LV, Higgins JPT, Rothstein HR. Random-Effects Model. In:  
592 *Introduction to Meta-Analysis* (ed<sup>^</sup>(eds). John Wiley & Sons, Ltd (2009).  
593
- 594 40. Alexa A, Rahnenfuhrer J. topGO: enrichment analysis for gene ontology. *R package*  
595 *version*, (2010).  
596

- 597 41. Walter W, Sanchez-Cabo F, Ricote M. GOplot: an R package for visually combining  
598 expression data with functional analysis. *Bioinformatics* **31**, 2912-2914 (2015).  
599
- 600 42. Lin CY, Wu HF, Tjeerdema RS, Viant MR. Evaluation of metabolite extraction strategies  
601 from tissue samples using NMR metabolomics. *Metabolomics* **3**, 55-67 (2007).  
602
- 603 43. Weindl D, Wegner A, Hiller K. MIA: non-targeted mass isotopologue analysis.  
604 *Bioinformatics* **32**, 2875-2876 (2016).  
605
- 606 44. Xia J, Sinelnikov IV, Han B, Wishart DS. MetaboAnalyst 3.0--making metabolomics  
607 more meaningful. *Nucleic Acids Res* **43**, W251-257 (2015).  
608  
609
